# Supplementary material for: A Correction Algorithm for Propeller-Induced Airflow and Flight Attitude Changes during Three-Dimensional Wind Speed Measurements Made from A Rotary Unmanned Aerial Vehicle
Source: Copernicus journal article supplement (doi:10.5194/amt-2023-248), 2024-01-23
Supplement: Supplementary file 1 [file amt-2023-248-supplement.pdf]

1 *Supplement of*

2 **A Correction Algorithm for Propeller-Induced Airflow**  
3 **and Flight Attitude Changes during Three-**  
4 **Dimensional Wind Speed Measurements Made from A**  
5 **Rotary Unmanned Aerial Vehicle**

6 Yanrong Yang<sup>1+</sup>, Yuheng Zhang<sup>1+</sup>, Tianran Han<sup>1</sup>, Conghui Xie<sup>1</sup>, Yayong Liu<sup>1</sup>, Yufei  
7 Huang<sup>1</sup>, Jietao Zhou<sup>1</sup>, Haijiong Sun<sup>1</sup>, Delong Zhao<sup>2</sup>, Kui Zhang<sup>3</sup>, Shao-Meng Li<sup>1\*</sup>

8 <sup>1</sup>College of Environmental Sciences and Engineering, Peking University, Beijing 100871, China

9 <sup>2</sup>Beijing Weather Modification Center, Beijing 100089, China

10 <sup>3</sup>Beijing Wisdominc Technology Co., Ltd, Beijing 100070, China

11 <sup>+</sup>Contributed equally to the work

12 *Correspondence to:* Shao-Meng Li (shaomeng.li@pku.edu.cn)

13

14

15

16

17

18

19

20

21

22

23

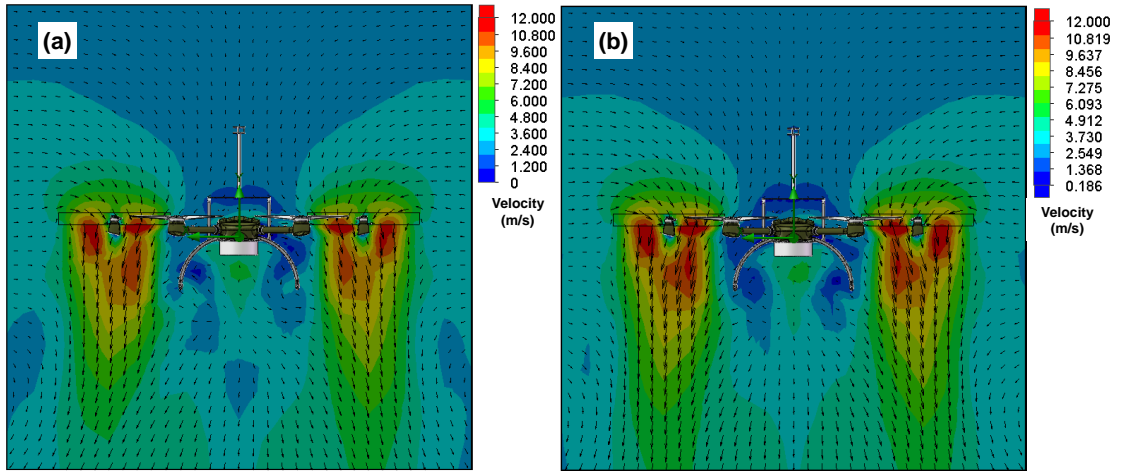

24

25 **Figure S1: Example results of Computational Fluid Dynamics (CFD) simulation for the unmanned aerial**  
 26 **vehicle. (a) and (b) show the flow field simulation for the UAV flying at ground speed of  $8 \text{ m s}^{-1}$  with a tailwind**  
 27 **speed of  $5.4 \text{ m s}^{-1}$  at altitudes of 30 meters and 1000 meters, respectively.**

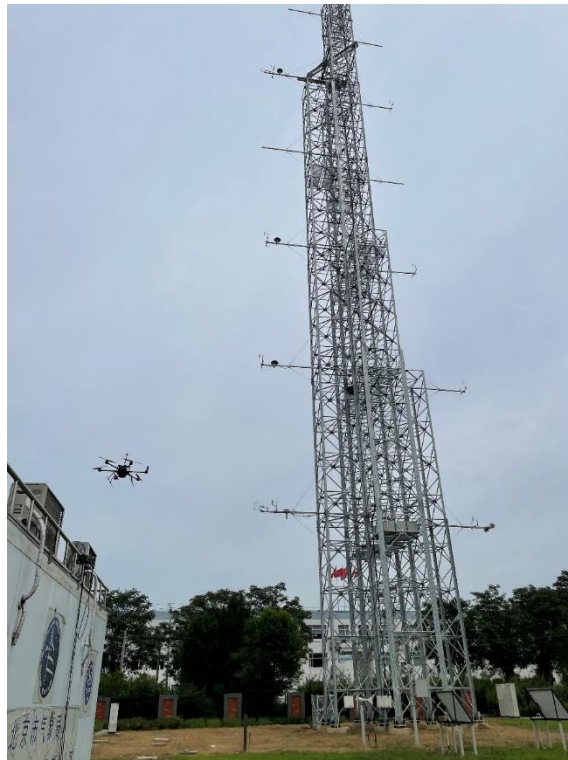

28

29 **Figure S2: Comparison between UAV-based and Tower-based wind speed measurements.**

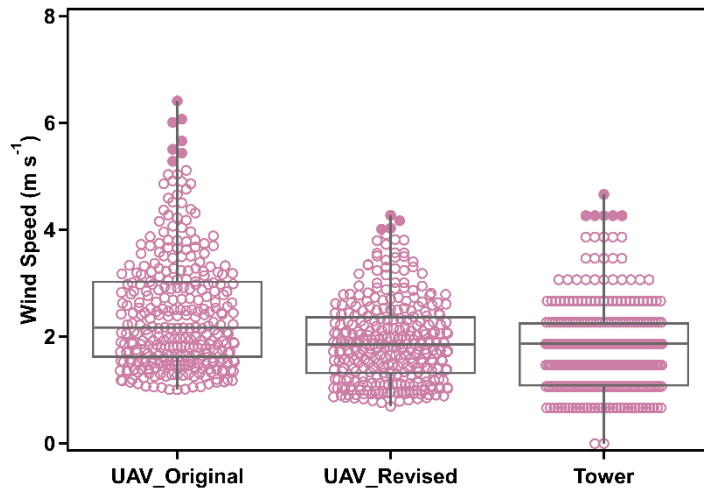

30

31 **Figure S3: Boxplots of tower-based wind speed (Tower), UAV-based wind speed corrected for motion and**  
 32 **attitude (UAV\_Original), and UAV-based wind speed with comprehensive correction for rotor disturbance,**  
 33 **motion, and attitude (UAV\_Revised).**

34

35

36

37

38

39

40

41

42

43

44

45

46

47

48

49

50

51

52

53

54

55

56

57

58

59

60

61

62 **Table S1: Parameters configuration for simulating UAV flight at 30 m altitude.**

| Wind Type | Wind Level | Wind Speed (m s <sup>-1</sup> ) | Air Speed (m s <sup>-1</sup> ) | Ground Speed (m s <sup>-1</sup> ) | Attack Angle (°) | Sideslip Angle (°) | Wind Resistance (N) | Pull Force (N) | Rotor Speed (rpm) |
|-----------|------------|---------------------------------|--------------------------------|-----------------------------------|------------------|--------------------|---------------------|----------------|-------------------|
|           | 1          | 1.5                             | 19.5                           | 18                                | 11.77            | -                  | 58.96               | 288.99         | 2633.11           |
|           | 2          | 3.3                             | 21.3                           | 18                                | 14.51            | -                  | 73.23               | 292.24         | 2647.85           |
|           | 1          | 1.5                             | 15.5                           | 14                                | 6.92             | -                  | 34.35               | 284.99         | 2614.82           |
|           | 2          | 3.3                             | 17.3                           | 14                                | 8.90             | -                  | 44.30               | 286.36         | 2621.10           |
|           | 3          | 5.4                             | 19.4                           | 14                                | 11.63            | -                  | 58.23               | 288.85         | 2632.44           |
|           | 4          | 7.9                             | 21.9                           | 14                                | 15.50            | -                  | 78.47               | 293.60         | 2653.99           |
| Headwind  | 1          | 1.5                             | 11.5                           | 10                                | 3.59             | -                  | 17.73               | 283.47         | 2607.82           |
|           | 2          | 3.3                             | 13.3                           | 10                                | 4.92             | -                  | 24.35               | 283.96         | 2610.08           |
|           | 3          | 5.4                             | 15.4                           | 10                                | 6.82             | -                  | 33.84               | 284.93         | 2614.54           |
|           | 4          | 7.9                             | 17.9                           | 10                                | 9.63             | -                  | 48.01               | 286.96         | 2623.83           |
|           | 5          | 10.7                            | 20.7                           | 10                                | 13.56            | -                  | 68.23               | 291.03         | 2642.36           |
|           | 1          | 1.5                             | 9.5                            | 8                                 | 2.39             | -                  | 11.80               | 283.16         | 2606.40           |
|           | 2          | 3.3                             | 11.3                           | 8                                 | 3.45             | -                  | 17.07               | 283.43         | 2607.64           |

|          |   |      |      |    |       |   |       |        |         |
|----------|---|------|------|----|-------|---|-------|--------|---------|
|          | 3 | 5.4  | 13.4 | 8  | 5.00  | - | 24.76 | 284.00 | 2610.24 |
|          | 4 | 7.9  | 15.9 | 8  | 7.33  | - | 36.41 | 285.25 | 2615.99 |
|          | 5 | 10.7 | 18.7 | 8  | 10.67 | - | 53.29 | 287.89 | 2628.08 |
|          | 1 | 1.5  | 16.5 | 18 | 7.98  | - | 39.67 | 285.68 | 2617.98 |
|          | 2 | 3.3  | 14.7 | 18 | 6.14  | - | 30.45 | 284.55 | 2612.78 |
|          | 3 | 5.4  | 12.6 | 18 | 4.37  | - | 21.62 | 283.74 | 2609.07 |
|          | 4 | 7.9  | 10.1 | 18 | 2.72  | - | 13.43 | 283.23 | 2606.74 |
|          | 5 | 10.7 | 7.3  | 18 | 1.38  | - | 6.82  | 283.00 | 2605.65 |
|          | 6 | 14   | 4    | 18 | 0.41  | - | 2.00  | 282.92 | 2605.30 |
| Tailwind | 1 | 1.5  | 12.5 | 14 | 4.29  | - | 21.25 | 283.71 | 2608.94 |
|          | 2 | 3.3  | 10.7 | 14 | 3.07  | - | 15.18 | 283.32 | 2607.15 |
|          | 3 | 5.4  | 8.6  | 14 | 1.94  | - | 9.58  | 283.08 | 2606.02 |
|          | 4 | 7.9  | 6.1  | 14 | 0.95  | - | 4.71  | 282.96 | 2605.45 |
|          | 5 | 10.7 | 3.3  | 14 | 0.28  | - | 1.36  | 282.92 | 2605.29 |
|          | 1 | 1.5  | 8.5  | 10 | 1.89  | - | 9.34  | 283.07 | 2605.98 |
|          | 2 | 3.3  | 6.7  | 10 | 1.16  | - | 5.71  | 282.97 | 2605.54 |
|          | 3 | 5.4  | 4.6  | 10 | 0.54  | - | 2.66  | 282.93 | 2605.33 |

|           |   |      |       |    |      |       |       |        |         |
|-----------|---|------|-------|----|------|-------|-------|--------|---------|
|           | 4 | 7.9  | 2.1   | 10 | 0.11 | -     | 0.55  | 282.92 | 2605.27 |
|           | 1 | 1.5  | 6.5   | 8  | 1.09 | -     | 5.37  | 282.97 | 2605.51 |
|           | 2 | 3.3  | 4.7   | 8  | 0.56 | -     | 2.77  | 282.93 | 2605.33 |
|           | 3 | 5.4  | 2.6   | 8  | 0.17 | -     | 0.84  | 282.92 | 2605.28 |
|           | 1 | 1.5  | 18.06 | 18 | 9.76 | -0.06 | 49.05 | 287.12 | 2624.55 |
|           | 2 | 3.3  | 18.30 | 18 | 9.76 | 0.28  | 50.61 | 287.31 | 2625.42 |
|           | 3 | 5.4  | 18.79 | 18 | 9.76 | 0.74  | 53.93 | 287.74 | 2627.37 |
|           | 4 | 7.9  | 19.66 | 18 | 9.76 | 1.62  | 60.12 | 288.59 | 2631.28 |
|           | 5 | 10.7 | 20.94 | 18 | 9.76 | 3.07  | 70.20 | 290.16 | 2638.42 |
|           | 6 | 14   | 22.80 | 18 | 9.76 | 5.51  | 86.83 | 293.27 | 2652.50 |
| Crosswind | 1 | 1.5  | 14.08 | 14 | 5.51 | 0.06  | 27.64 | 284.26 | 2611.44 |
|           | 2 | 3.3  | 14.38 | 14 | 5.51 | 0.28  | 29.00 | 284.36 | 2611.93 |
|           | 3 | 5.4  | 15.01 | 14 | 5.51 | 0.74  | 31.90 | 284.61 | 2613.06 |
|           | 4 | 7.9  | 16.08 | 14 | 5.51 | 1.62  | 37.34 | 285.12 | 2615.42 |
|           | 5 | 10.7 | 17.62 | 14 | 5.51 | 3.07  | 46.26 | 286.12 | 2619.98 |
|           | 6 | 14   | 19.80 | 14 | 5.51 | 5.51  | 61.18 | 288.23 | 2629.63 |
|           | 1 | 1.5  | 10.11 | 10 | 2.66 | 0.06  | 13.46 | 283.23 | 2606.74 |

|   |      |       |    |      |      |       |        |         |
|---|------|-------|----|------|------|-------|--------|---------|
| 2 | 3.3  | 10.53 | 10 | 2.66 | 0.28 | 14.68 | 283.29 | 2606.98 |
| 3 | 5.4  | 11.36 | 10 | 2.66 | 0.74 | 17.28 | 283.42 | 2607.57 |
| 4 | 7.9  | 12.74 | 10 | 2.66 | 1.62 | 22.17 | 283.71 | 2608.92 |
| 5 | 10.7 | 14.65 | 10 | 2.66 | 3.07 | 30.20 | 284.34 | 2611.81 |
| 6 | 14   | 17.20 | 10 | 2.66 | 5.51 | 43.73 | 285.82 | 2618.60 |
| 1 | 1.5  | 8.14  | 8  | 1.67 | 0.06 | 8.54  | 283.04 | 2605.86 |
| 2 | 3.3  | 8.65  | 8  | 1.67 | 0.28 | 9.70  | 283.08 | 2606.02 |
| 3 | 5.4  | 9.65  | 8  | 1.67 | 0.74 | 12.20 | 283.17 | 2606.43 |
| 4 | 7.9  | 11.24 | 8  | 1.67 | 1.62 | 16.89 | 283.38 | 2607.42 |
| 5 | 10.7 | 13.36 | 8  | 1.67 | 3.07 | 24.60 | 283.89 | 2609.74 |
| 6 | 14   | 16.12 | 8  | 1.67 | 5.51 | 37.61 | 285.15 | 2615.54 |

63

64 **Table S2. Parameters configuration for simulating UAV flight at 1000 m altitude.**

| Wind Type | Wind Level | Wind Speed<br>(m s <sup>-1</sup> ) | Air Speed<br>(m s <sup>-1</sup> ) | Ground Speed<br>(m s <sup>-1</sup> ) | Attack Angle<br>(°) | Sideslip Angle<br>(°) | Wind Resistance<br>(N) | Pull Force<br>(N) | Rotor Speed<br>(rpm) |
|-----------|------------|------------------------------------|-----------------------------------|--------------------------------------|---------------------|-----------------------|------------------------|-------------------|----------------------|
| Headwind  | 1          | 1.5                                | 19.5                              | 18                                   | 10.53               | -                     | 52.61                  | 287.77            | 2754.70              |

|          |       |      |      |    |       |   |       |        |         |
|----------|-------|------|------|----|-------|---|-------|--------|---------|
|          | 2     | 3.3  | 21.3 | 18 | 12.97 | - | 65.17 | 290.32 | 2766.92 |
|          | 1     | 1.5  | 15.5 | 14 | 6.22  | - | 30.85 | 284.59 | 2739.47 |
|          | 2     | 3.3  | 17.3 | 14 | 7.98  | - | 39.67 | 285.68 | 2744.71 |
|          | 3     | 5.4  | 19.4 | 14 | 10.41 | - | 51.97 | 287.65 | 2754.14 |
|          | 4     | 7.9  | 21.9 | 14 | 13.85 | - | 69.78 | 291.39 | 2772.01 |
|          | 1     | 1.5  | 11.5 | 10 | 3.24  | - | 16.01 | 283.37 | 2733.57 |
|          | 2     | 3.3  | 13.3 | 10 | 4.44  | - | 21.94 | 283.77 | 2735.48 |
|          | 3     | 5.4  | 15.4 | 10 | 6.13  | - | 30.40 | 284.54 | 2739.24 |
|          | 4     | 7.9  | 17.9 | 10 | 8.63  | - | 42.95 | 286.16 | 2746.99 |
|          | 5     | 10.7 | 20.7 | 10 | 12.12 | - | 60.77 | 289.37 | 2762.36 |
|          | 1     | 1.5  | 9.5  | 8  | 2.16  | - | 10.68 | 283.12 | 2732.36 |
|          | 2     | 3.3  | 11.3 | 8  | 3.12  | - | 15.42 | 283.34 | 2733.41 |
|          | 3     | 5.4  | 13.4 | 8  | 4.51  | - | 22.31 | 283.79 | 2735.62 |
|          | 4     | 7.9  | 15.9 | 8  | 6.59  | - | 32.68 | 284.80 | 2740.45 |
|          | 5     | 10.7 | 18.7 | 8  | 9.55  | - | 47.61 | 286.89 | 2750.52 |
|          | <hr/> |      |      |    |       |   |       |        |         |
| Tailwind | 1     | 1.5  | 16.5 | 18 | 7.17  | - | 35.57 | 285.14 | 2742.11 |
|          | 2     | 3.3  | 14.7 | 18 | 5.53  | - | 27.38 | 284.24 | 2737.76 |



|           |   |      |       |    |      |      |       |        |         |
|-----------|---|------|-------|----|------|------|-------|--------|---------|
|           | 3 | 5.4  | 12.6  | 18 | 3.94 | -    | 19.50 | 283.59 | 2734.62 |
|           | 4 | 7.9  | 10.1  | 18 | 2.46 | -    | 12.15 | 283.18 | 2732.64 |
|           | 5 | 10.7 | 7.3   | 18 | 1.25 | -    | 6.18  | 282.98 | 2731.71 |
|           | 6 | 14   | 4     | 18 | 0.37 | -    | 1.82  | 282.92 | 2731.41 |
|           | 1 | 1.5  | 12.5  | 14 | 3.88 | -    | 19.17 | 283.56 | 2734.51 |
|           | 2 | 3.3  | 10.7  | 14 | 2.78 | -    | 13.73 | 283.25 | 2732.99 |
|           | 3 | 5.4  | 8.6   | 14 | 1.76 | -    | 8.68  | 283.05 | 2732.03 |
|           | 4 | 7.9  | 6.1   | 14 | 0.87 | -    | 4.28  | 282.95 | 2731.54 |
|           | 5 | 10.7 | 3.3   | 14 | 0.25 | -    | 1.24  | 282.92 | 2731.40 |
|           | 1 | 1.5  | 8.5   | 10 | 1.71 | -    | 8.47  | 283.04 | 2732.00 |
|           | 2 | 3.3  | 6.7   | 10 | 1.05 | -    | 5.18  | 282.96 | 2731.61 |
|           | 3 | 5.4  | 4.6   | 10 | 0.49 | -    | 2.41  | 282.93 | 2731.43 |
|           | 4 | 7.9  | 2.1   | 10 | 0.10 | -    | 0.50  | 282.92 | 2731.39 |
|           | 1 | 1.5  | 6.5   | 8  | 0.99 | -    | 4.87  | 282.96 | 2731.59 |
|           | 2 | 3.3  | 4.7   | 8  | 0.51 | -    | 2.52  | 282.93 | 2731.44 |
|           | 3 | 5.4  | 2.6   | 8  | 0.15 | -    | 0.77  | 282.92 | 2731.39 |
| Crosswind | 1 | 1.5  | 18.06 | 18 | 8.74 | 0.05 | 43.87 | 286.28 | 2747.59 |

|   |      |       |    |      |      |       |        |         |
|---|------|-------|----|------|------|-------|--------|---------|
| 2 | 3.3  | 18.30 | 18 | 8.74 | 0.25 | 45.24 | 286.44 | 2748.34 |
| 3 | 5.4  | 18.79 | 18 | 8.74 | 0.68 | 48.17 | 286.78 | 2749.99 |
| 4 | 7.9  | 19.66 | 18 | 8.74 | 1.47 | 53.63 | 287.48 | 2753.31 |
| 5 | 10.7 | 20.94 | 18 | 8.74 | 2.78 | 62.51 | 288.74 | 2759.33 |
| 6 | 14   | 22.80 | 18 | 8.74 | 4.96 | 77.14 | 291.21 | 2771.14 |
| 1 | 1.5  | 14.08 | 14 | 4.96 | 0.05 | 24.88 | 284.00 | 2736.63 |
| 2 | 3.3  | 14.38 | 14 | 4.96 | 0.25 | 26.09 | 284.09 | 2737.05 |
| 3 | 5.4  | 15.01 | 14 | 4.96 | 0.68 | 28.67 | 284.29 | 2738.02 |
| 4 | 7.9  | 16.08 | 14 | 4.96 | 1.47 | 33.51 | 284.71 | 2740.03 |
| 5 | 10.7 | 17.62 | 14 | 4.96 | 2.78 | 41.40 | 285.52 | 2743.92 |
| 6 | 14   | 19.80 | 14 | 4.96 | 4.96 | 54.57 | 287.22 | 2752.06 |
| 1 | 1.5  | 10.11 | 10 | 2.41 | 0.05 | 12.18 | 283.18 | 2732.64 |
| 2 | 3.3  | 10.53 | 10 | 2.41 | 0.25 | 13.27 | 283.22 | 2732.86 |
| 3 | 5.4  | 11.36 | 10 | 2.41 | 0.68 | 15.61 | 283.33 | 2733.37 |
| 4 | 7.9  | 12.74 | 10 | 2.41 | 1.47 | 19.99 | 283.57 | 2734.52 |
| 5 | 10.7 | 14.65 | 10 | 2.41 | 2.78 | 27.16 | 284.08 | 2736.99 |
| 6 | 14   | 17.20 | 10 | 2.41 | 4.96 | 39.17 | 285.27 | 2742.74 |

|   |      |       |   |      |      |       |        |         |
|---|------|-------|---|------|------|-------|--------|---------|
| 1 | 1.5  | 8.14  | 8 | 1.51 | 0.05 | 7.74  | 283.02 | 2731.89 |
| 2 | 3.3  | 8.65  | 8 | 1.51 | 0.25 | 8.79  | 283.05 | 2732.03 |
| 3 | 5.4  | 9.65  | 8 | 1.51 | 0.68 | 11.04 | 283.12 | 2732.38 |
| 4 | 7.9  | 11.24 | 8 | 1.51 | 1.47 | 15.26 | 283.30 | 2733.24 |
| 5 | 10.7 | 13.36 | 8 | 1.51 | 2.78 | 22.16 | 283.71 | 2735.22 |
| 6 | 14   | 16.12 | 8 | 1.51 | 4.96 | 33.74 | 284.73 | 2740.14 |

---

**Table S3: Wind speed configuration and simulation results for UAV flight at 30 m altitude.**

| Wind Type | Wind Level | Wind Speed           | Air Speed            | Ground Speed         | $u_{x\_air}$         | $u_{y\_air}$         | $u_{z\_air}$         | $u_{x\_sensor\_avg}$ | $u_{y\_sensor\_avg}$ | $u_{z\_sensor\_avg}$ | $\Delta u_{x\_avg}$  | $\Delta u_{x\_std}$  | $\Delta u_{y\_avg}$  | $\Delta u_{y\_std}$  | $\Delta u_{z\_avg}$  | $\Delta u_{z\_std}$  |
|-----------|------------|----------------------|----------------------|----------------------|----------------------|----------------------|----------------------|----------------------|----------------------|----------------------|----------------------|----------------------|----------------------|----------------------|----------------------|----------------------|
|           |            | (m s <sup>-1</sup> ) |
| Headwind  | 1          | 1.5                  | 19.5                 | 18                   | -19.09               | 0                    | 3.98                 | -19.74               | 0.025                | -19.737              | -0.65                | 0.0058               | 0.025                | 0.015                | -2.18                | 0.024                |
|           | 2          | 3.3                  | 21.3                 | 18                   | -20.62               | 0                    | 5.34                 | -20.96               | -0.10                | -20.965              | -0.34                | 0.26                 | -0.10                | 0.061                | -2.83                | 0.16                 |
|           | 1          | 1.5                  | 15.5                 | 14                   | -15.39               | 0                    | 1.87                 | -15.96               | -0.074               | -15.961              | -0.57                | 0.13                 | -0.074               | 0.0050               | -1.44                | 0.087                |
|           | 2          | 3.3                  | 17.3                 | 14                   | -17.09               | 0                    | 2.68                 | -17.76               | 0.003                | -17.757              | -0.67                | 0.042                | 0.003                | 0.087                | -1.55                | 0.077                |
|           | 3          | 5.4                  | 19.4                 | 14                   | -19.00               | 0                    | 3.91                 | -19.52               | 0.050                | -19.516              | -0.51                | 0.014                | 0.050                | 0.0034               | -2.13                | 0.015                |
|           | 4          | 7.9                  | 21.9                 | 14                   | -21.10               | 0                    | 5.85                 | -21.64               | -0.091               | -21.639              | -0.54                | 0.071                | -0.091               | 0.044                | -3.18                | 0.19                 |
|           | 1          | 1.5                  | 11.5                 | 10                   | -11.48               | 0                    | 0.72                 | -12.20               | -0.085               | -12.199              | -0.72                | 0.016                | -0.085               | 0.0083               | -0.65                | 0.042                |
|           | 2          | 3.3                  | 13.3                 | 10                   | -13.25               | 0                    | 1.14                 | -13.75               | -0.11                | -13.752              | -0.50                | 0.058                | -0.11                | 0.0085               | -1.07                | 0.078                |
|           | 3          | 5.4                  | 15.4                 | 10                   | -15.29               | 0                    | 1.83                 | -15.90               | -0.063               | -15.903              | -0.61                | 0.15                 | -0.063               | 0.0055               | -1.46                | 0.092                |
|           | 4          | 7.9                  | 17.9                 | 10                   | -17.65               | 0                    | 3.00                 | -18.24               | 0.072                | -18.242              | -0.59                | 0.067                | 0.072                | 0.073                | -1.40                | 0.033                |
|           | 5          | 10.7                 | 20.7                 | 10                   | -20.12               | 0                    | 4.85                 | -21.20               | -0.029               | -21.203              | -1.08                | 0.012                | -0.029               | 0.018                | -2.61                | 0.31                 |
|           | 1          | 1.5                  | 9.5                  | 8                    | -9.49                | 0                    | 0.40                 | -9.33                | -0.0094              | -9.328               | 0.16                 | 0.24                 | -0.0094              | 0.026                | -0.45                | 0.069                |
|           | 2          | 3.3                  | 11.3                 | 8                    | -11.28               | 0                    | 0.68                 | -11.95               | -0.040               | -11.950              | -0.67                | 0.0058               | -0.040               | 0.034                | -0.60                | 0.035                |

|          |   |      |      |    |        |      |       |        |        |         |       |       |        |       |        |       |
|----------|---|------|------|----|--------|------|-------|--------|--------|---------|-------|-------|--------|-------|--------|-------|
|          | 3 | 5.4  | 13.4 | 8  | -13.35 | 0    | 1.17  | -13.86 | -0.099 | -13.859 | -0.51 | 0.035 | -0.099 | 0.011 | -1.09  | 0.093 |
|          | 4 | 7.9  | 15.9 | 8  | -15.77 | 0    | 2.03  | -16.48 | -0.067 | -16.481 | -0.71 | 0.012 | -0.067 | 0.044 | -1.47  | 0.062 |
|          | 5 | 10.7 | 18.7 | 8  | -18.38 | 0    | 3.46  | -18.71 | -0.027 | -18.713 | -0.34 | 0.015 | -0.027 | 0.019 | -1.82  | 0.057 |
|          | 1 | 1.5  | 16.5 | 18 | -16.34 | 0.00 | 2.29  | -16.90 | 0.021  | 0.81    | -0.56 | 0.015 | 0.021  | 0.044 | -1.48  | 0.025 |
|          | 2 | 3.3  | 14.7 | 18 | -14.62 | 0.00 | 1.57  | -14.92 | -0.038 | 0.24    | -0.30 | 0.018 | -0.038 | 0.017 | -1.33  | 0.030 |
|          | 3 | 5.4  | 12.6 | 18 | -12.56 | 0.00 | 0.96  | -13.08 | -0.042 | 0.06    | -0.52 | 0.028 | -0.042 | 0.077 | -0.90  | 0.057 |
|          | 4 | 7.9  | 10.1 | 18 | -10.09 | 0.00 | 0.48  | -10.24 | -0.039 | -0.10   | -0.15 | 0.021 | -0.039 | 0.045 | -0.58  | 0.066 |
|          | 5 | 10.7 | 7.3  | 18 | -7.30  | 0.00 | 0.18  | -7.10  | -0.070 | -0.034  | 0.19  | 0.14  | -0.070 | 0.003 | -0.21  | 0.013 |
|          | 6 | 14   | 4    | 18 | -4.00  | 0.00 | 0.03  | -3.75  | -0.055 | 0.70    | 0.25  | 0.047 | -0.055 | 0.010 | 0.67   | 0.021 |
| Tailwind | 1 | 1.5  | 12.5 | 14 | -12.46 | 0.00 | 0.94  | -12.94 | -0.049 | 0.015   | -0.48 | 0.065 | -0.049 | 0.028 | -0.92  | 0.065 |
|          | 2 | 3.3  | 10.7 | 14 | -10.68 | 0.00 | 0.57  | -11.08 | 0.043  | 0.12    | -0.39 | 0.028 | 0.043  | 0.053 | -0.45  | 0.113 |
|          | 3 | 5.4  | 8.6  | 14 | -8.60  | 0.00 | 0.29  | -8.26  | -0.001 | -0.12   | 0.34  | 0.027 | -0.001 | 0.045 | -0.41  | 0.063 |
|          | 4 | 7.9  | 6.1  | 14 | -6.10  | 0.00 | 0.10  | -6.00  | -0.067 | 0.10    | 0.10  | 0.013 | -0.067 | 0.013 | -0.01  | 0.065 |
|          | 5 | 10.7 | 3.3  | 14 | -3.30  | 0.00 | 0.016 | -2.92  | -0.041 | 0.71    | 0.38  | 0.054 | -0.041 | 0.003 | 0.69   | 0.028 |
|          | 1 | 1.5  | 8.5  | 10 | -8.50  | 0.00 | 0.28  | -8.20  | -0.024 | -0.14   | 0.30  | 0.063 | -0.024 | 0.047 | -0.42  | 0.054 |
|          | 2 | 3.3  | 6.7  | 10 | -6.70  | 0.00 | 0.14  | -6.48  | -0.058 | 0.05    | 0.22  | 0.066 | -0.058 | 0.011 | -0.087 | 0.027 |
|          | 3 | 5.4  | 4.6  | 10 | -4.60  | 0.00 | 0.043 | -4.58  | 0.028  | 0.68    | 0.02  | 0.11  | 0.028  | 0.018 | 0.64   | 0.135 |

|           |   |      |       |    |        |       |        |        |        |        |       |       |        |       |       |       |
|-----------|---|------|-------|----|--------|-------|--------|--------|--------|--------|-------|-------|--------|-------|-------|-------|
|           | 4 | 7.9  | 2.1   | 10 | -2.10  | 0.00  | 0.0041 | -1.12  | -0.002 | 0.69   | 0.98  | 0.065 | -0.002 | 0.017 | 0.68  | 0.015 |
|           | 1 | 1.5  | 6.5   | 8  | -6.50  | 0.00  | 0.12   | -6.22  | -0.063 | 0.03   | 0.28  | 0.057 | -0.063 | 0.014 | -0.10 | 0.028 |
|           | 2 | 3.3  | 4.7   | 8  | -4.70  | 0.00  | 0.046  | -4.70  | -0.025 | 0.57   | 0.00  | 0.030 | -0.025 | 0.029 | 0.52  | 0.047 |
|           | 3 | 5.4  | 2.6   | 8  | -2.60  | 0.00  | 0.0077 | -2.04  | 0.010  | 0.70   | 0.56  | 0.025 | 0.010  | 0.016 | 0.69  | 0.018 |
|           | 1 | 1.5  | 18.06 | 18 | -17.80 | 0.018 | 3.06   | -18.38 | -0.04  | 1.57   | -0.58 | 0.021 | -0.062 | 0.103 | -1.49 | 0.058 |
|           | 2 | 3.3  | 18.30 | 18 | -18.04 | 0.088 | 3.10   | -18.65 | 0.18   | 1.51   | -0.62 | 0.11  | 0.089  | 0.016 | -1.59 | 0.043 |
|           | 3 | 5.4  | 18.79 | 18 | -18.52 | 0.24  | 3.19   | -19.21 | 0.50   | 1.65   | -0.69 | 0.075 | 0.25   | 0.018 | -1.53 | 0.023 |
|           | 4 | 7.9  | 19.66 | 18 | -19.37 | 0.56  | 3.33   | -20.21 | 1.09   | 1.61   | -0.85 | 0.066 | 0.53   | 0.009 | -1.72 | 0.029 |
|           | 5 | 10.7 | 20.94 | 18 | -20.61 | 1.12  | 3.55   | -21.44 | 1.76   | 1.77   | -0.83 | 0.078 | 0.64   | 0.024 | -1.78 | 0.041 |
|           | 6 | 14   | 22.80 | 18 | -22.37 | 2.19  | 3.86   | -23.27 | 2.60   | 1.79   | -0.90 | 0.056 | 0.41   | 0.046 | -2.08 | 0.038 |
| Crosswind | 1 | 1.5  | 14.08 | 14 | -14.02 | 0.014 | 1.35   | -14.35 | -0.06  | 0.17   | -0.33 | 0.12  | -0.078 | 0.012 | -1.18 | 0.063 |
|           | 2 | 3.3  | 14.38 | 14 | -14.32 | 0.069 | 1.38   | -14.69 | -0.01  | 0.20   | -0.38 | 0.10  | -0.084 | 0.003 | -1.18 | 0.056 |
|           | 3 | 5.4  | 15.01 | 14 | -14.93 | 0.19  | 1.44   | -15.38 | 0.31   | 0.10   | -0.44 | 0.11  | 0.11   | 0.025 | -1.34 | 0.080 |
|           | 4 | 7.9  | 16.08 | 14 | -15.99 | 0.46  | 1.54   | -16.49 | 0.79   | 0.16   | -0.49 | 0.14  | 0.34   | 0.009 | -1.39 | 0.10  |
|           | 5 | 10.7 | 17.62 | 14 | -17.51 | 0.94  | 1.69   | -17.78 | 1.07   | 0.15   | -0.27 | 0.20  | 0.13   | 0.073 | -1.54 | 0.16  |
|           | 6 | 14   | 19.80 | 14 | -19.62 | 1.90  | 1.90   | -20.04 | 1.98   | 0.21   | -0.42 | 0.18  | 0.082  | 0.095 | -1.69 | 0.11  |
|           | 1 | 1.5  | 10.11 | 10 | -10.10 | 0.010 | 0.47   | -10.39 | -0.05  | -0.065 | -0.29 | 0.11  | -0.064 | 0.021 | -0.53 | 0.042 |

|   |      |       |    |        |        |      |        |       |       |       |      |        |        |       |       |
|---|------|-------|----|--------|--------|------|--------|-------|-------|-------|------|--------|--------|-------|-------|
| 2 | 3.3  | 10.53 | 10 | -10.52 | 0.051  | 0.49 | -10.84 | 0.05  | -0.16 | -0.32 | 0.13 | 0.00   | 0.075  | -0.65 | 0.094 |
| 3 | 5.4  | 11.36 | 10 | -11.35 | 0.15   | 0.53 | -11.84 | 0.19  | -0.22 | -0.49 | 0.11 | 0.037  | 0.017  | -0.75 | 0.16  |
| 4 | 7.9  | 12.74 | 10 | -12.73 | 0.36   | 0.59 | -13.30 | 0.59  | -0.32 | -0.57 | 0.09 | 0.23   | 0.023  | -0.91 | 0.15  |
| 5 | 10.7 | 14.65 | 10 | -14.61 | 0.78   | 0.68 | -15.24 | 0.99  | -0.40 | -0.63 | 0.11 | 0.21   | 0.011  | -1.08 | 0.15  |
| 6 | 14   | 17.20 | 10 | -17.11 | 1.65   | 0.80 | -17.93 | 1.71  | -0.48 | -0.82 | 0.14 | 0.056  | 0.086  | -1.28 | 0.15  |
| 1 | 1.5  | 8.14  | 8  | -8.14  | 0.0080 | 0.24 | -7.83  | -0.06 | -0.19 | 0.31  | 0.15 | -0.065 | 0.047  | -0.43 | 0.015 |
| 2 | 3.3  | 8.65  | 8  | -8.65  | 0.042  | 0.25 | -8.44  | -0.05 | -0.18 | 0.21  | 0.22 | -0.094 | 0.085  | -0.43 | 0.053 |
| 3 | 5.4  | 9.65  | 8  | -9.65  | 0.13   | 0.28 | -9.58  | 0.11  | -0.25 | 0.07  | 0.15 | -0.011 | 0.025  | -0.53 | 0.033 |
| 4 | 7.9  | 11.24 | 8  | -11.23 | 0.32   | 0.33 | -11.32 | 0.35  | -0.38 | -0.09 | 0.17 | 0.030  | 0.0081 | -0.71 | 0.035 |
| 5 | 10.7 | 13.36 | 8  | -13.34 | 0.72   | 0.39 | -13.52 | 0.44  | -0.32 | -0.19 | 0.20 | -0.28  | 0.066  | -0.71 | 0.088 |
| 6 | 14   | 16.12 | 8  | -16.04 | 1.55   | 0.47 | -16.33 | 1.94  | -0.45 | -0.29 | 0.29 | 0.40   | 0.050  | -0.92 | 0.047 |

**Table S4: Wind speed configuration and simulation results for UAV flight at 1000 m altitude.**

| Wind Type | Wind Level | Wind Speed<br>(m s <sup>-1</sup> ) | Air Speed<br>(m s <sup>-1</sup> ) | Ground Speed<br>(m s <sup>-1</sup> ) | $u_{x\_air}$<br>(m s <sup>-1</sup> ) | $u_{y\_air}$<br>(m s <sup>-1</sup> ) | $u_{z\_air}$<br>(m s <sup>-1</sup> ) | $u_{x\_sensor\_avg}$<br>(m s <sup>-1</sup> ) | $u_{y\_sensor\_avg}$<br>(m s <sup>-1</sup> ) | $u_{z\_sensor\_avg}$<br>(m s <sup>-1</sup> ) | $\Delta u_{x\_avg}$<br>(m s <sup>-1</sup> ) | $\Delta u_{x\_std}$<br>(m s <sup>-1</sup> ) | $\Delta u_{y\_avg}$<br>(m s <sup>-1</sup> ) | $\Delta u_{y\_std}$<br>(m s <sup>-1</sup> ) | $\Delta u_{z\_avg}$<br>(m s <sup>-1</sup> ) | $\Delta u_{z\_std}$<br>(m s <sup>-1</sup> ) |
|-----------|------------|------------------------------------|-----------------------------------|--------------------------------------|--------------------------------------|--------------------------------------|--------------------------------------|----------------------------------------------|----------------------------------------------|----------------------------------------------|---------------------------------------------|---------------------------------------------|---------------------------------------------|---------------------------------------------|---------------------------------------------|---------------------------------------------|
| Headwind  | 1          | 1.5                                | 19.5                              | 18                                   | -19.17                               | 0.00                                 | 3.98                                 | -19.61                                       | -0.064                                       | 1.71                                         | -0.52                                       | 0.037                                       | -0.064                                      | 0.046                                       | -2.27                                       | 0.062                                       |

|          |      |      |      |        |        |      |        |        |        |       |        |        |        |       |        |        |
|----------|------|------|------|--------|--------|------|--------|--------|--------|-------|--------|--------|--------|-------|--------|--------|
| 2        | 3.3  | 21.3 | 18   | -20.76 | 0.00   | 5.34 | -21.73 | -0.069 | 2.07   | -1.11 | 0.17   | -0.069 | 0.023  | -3.27 | 0.28   |        |
| 1        | 1.5  | 15.5 | 14   | -15.41 | 0.00   | 1.87 | -15.77 | -0.045 | 0.29   | -0.38 | 0.13   | -0.045 | 0.017  | -1.58 | 0.027  |        |
| 2        | 3.3  | 17.3 | 14   | -17.13 | 0.00   | 2.68 | -17.68 | -0.016 | 0.86   | -0.59 | 0.13   | -0.016 | 0.019  | -1.82 | 0.025  |        |
| 3        | 5.4  | 19.4 | 14   | -19.08 | 0.00   | 3.91 | -19.63 | 0.018  | 1.74   | -0.63 | 0.017  | 0.018  | 0.013  | -2.17 | 0.072  |        |
| 4        | 7.9  | 21.9 | 14   | -21.26 | 0.00   | 5.85 | -22.38 | -0.049 | 2.54   | -1.28 | 0.043  | -0.049 | 0.012  | -3.31 | 0.33   |        |
| 1        | 1.5  | 11.5 | 10   | -11.48 | 0.00   | 0.72 | -11.97 | -0.049 | -0.15  | -0.49 | 0.12   | -0.049 | 0.088  | -0.87 | 0.14   |        |
| 2        | 3.3  | 13.3 | 10   | -13.26 | 0.00   | 1.14 | -13.71 | -0.033 | 0.10   | -0.46 | 0.041  | -0.033 | 0.0093 | -1.04 | 0.039  |        |
| 3        | 5.4  | 15.4 | 10   | -15.31 | 0.00   | 1.83 | -15.64 | -0.046 | 0.25   | -0.35 | 0.11   | -0.046 | 0.026  | -1.58 | 0.049  |        |
| 4        | 7.9  | 17.9 | 10   | -17.70 | 0.00   | 3.00 | -18.44 | -0.060 | 0.93   | -0.79 | 0.048  | -0.060 | 0.059  | -2.06 | 0.054  |        |
| 5        | 10.7 | 20.7 | 10   | -20.24 | 0.00   | 4.85 | -21.07 | 0.024  | 2.05   | -0.94 | 0.0094 | 0.024  | 0.0089 | -2.81 | 0.029  |        |
| 1        | 1.5  | 9.5  | 8    | -9.49  | 0.00   | 0.40 | -9.26  | -0.034 | -0.12  | 0.23  | 0.21   | -0.034 | 0.058  | -0.52 | 0.036  |        |
| 2        | 3.3  | 11.3 | 8    | -11.28 | 0.00   | 0.68 | -11.88 | 0.000  | -0.092 | -0.60 | 0.14   | 0.000  | 0.055  | -0.77 | 0.069  |        |
| 3        | 5.4  | 13.4 | 8    | -13.36 | 0.00   | 1.17 | -13.71 | -0.094 | 0.12   | -0.36 | 0.017  | -0.094 | 0.012  | -1.05 | 0.020  |        |
| 4        | 7.9  | 15.9 | 8    | -15.79 | 0.00   | 2.03 | -16.28 | -0.074 | 0.39   | -0.51 | 0.025  | -0.074 | 0.016  | -1.64 | 0.018  |        |
| 5        | 10.7 | 18.7 | 8    | -18.44 | 0.00   | 3.46 | -19.05 | 0.045  | 1.60   | -0.67 | 0.039  | 0.045  | 0.048  | -1.86 | 0.0092 |        |
| <hr/>    |      |      |      |        |        |      |        |        |        |       |        |        |        |       |        |        |
| Tailwind | 1    | 1.5  | 16.5 | 18     | -16.37 | 0.00 | 2.06   | -16.90 | -0.028 | 0.60  | -0.56  | 0.0016 | -0.028 | 0.031 | -1.46  | 0.051  |
|          | 2    | 3.3  | 14.7 | 18     | -14.63 | 0.00 | 1.42   | -15.10 | -0.12  | 0.23  | -0.49  | 0.010  | -0.12  | 0.019 | -1.18  | 0.0088 |



|   |      |      |    |        |      |        |        |         |       |       |        |         |        |        |        |
|---|------|------|----|--------|------|--------|--------|---------|-------|-------|--------|---------|--------|--------|--------|
| 3 | 5.4  | 12.6 | 18 | -12.57 | 0.00 | 0.87   | -13.39 | -0.083  | 0.09  | -0.83 | 0.0037 | -0.083  | 0.011  | -0.77  | 0.0050 |
| 4 | 7.9  | 10.1 | 18 | -10.09 | 0.00 | 0.43   | -9.85  | 0.014   | 0.02  | 0.24  | 0.0057 | 0.014   | 0.013  | -0.41  | 0.017  |
| 5 | 10.7 | 7.3  | 18 | -7.30  | 0.00 | 0.16   | -6.95  | -0.047  | 0.00  | 0.35  | 0.0004 | -0.047  | 0.021  | -0.16  | 0.0035 |
| 6 | 14   | 4    | 18 | -4.00  | 0.00 | 0.026  | -3.72  | -0.024  | 0.78  | 0.28  | 0.028  | -0.024  | 0.002  | 0.75   | 0.0057 |
| 1 | 1.5  | 12.5 | 14 | -12.47 | 0.00 | 0.84   | -13.25 | -0.072  | 0.07  | -0.79 | 0.025  | -0.072  | 0.027  | -0.78  | 0.049  |
| 2 | 3.3  | 10.7 | 14 | -10.69 | 0.00 | 0.52   | -10.98 | -0.079  | -0.19 | -0.29 | 0.0028 | -0.079  | 0.031  | -0.71  | 0.071  |
| 3 | 5.4  | 8.6  | 14 | -8.60  | 0.00 | 0.26   | -8.24  | -0.058  | -0.16 | 0.35  | 0.0091 | -0.058  | 0.007  | -0.42  | 0.013  |
| 4 | 7.9  | 6.1  | 14 | -6.10  | 0.00 | 0.092  | -6.07  | -0.021  | 0.27  | 0.03  | 0.0035 | -0.021  | 0.018  | 0.18   | 0.025  |
| 5 | 10.7 | 3.3  | 14 | -3.30  | 0.00 | 0.014  | -2.83  | -0.034  | 0.73  | 0.47  | 0.030  | -0.034  | 0.003  | 0.72   | 0.0037 |
| 1 | 1.5  | 8.5  | 10 | -8.50  | 0.00 | 0.25   | -8.12  | -0.056  | -0.20 | 0.38  | 0.013  | -0.056  | 0.005  | -0.45  | 0.030  |
| 2 | 3.3  | 6.7  | 10 | -6.70  | 0.00 | 0.12   | -6.54  | -0.052  | 0.10  | 0.16  | 0.017  | -0.052  | 0.011  | -0.019 | 0.0091 |
| 3 | 5.4  | 4.6  | 10 | -4.60  | 0.00 | 0.04   | -4.50  | -0.017  | 0.69  | 0.10  | 0.071  | -0.017  | 0.042  | 0.65   | 0.000  |
| 4 | 7.9  | 2.1  | 10 | -2.10  | 0.00 | 0.0037 | -1.24  | -0.0082 | 0.75  | 0.86  | 0.049  | -0.0082 | 0.0019 | 0.75   | 0.0016 |
| 1 | 1.5  | 6.5  | 8  | -6.50  | 0.00 | 0.11   | -6.38  | 0.0086  | 0.13  | 0.12  | 0.0050 | 0.0086  | 0.0068 | 0.02   | 0.0028 |
| 2 | 3.3  | 4.7  | 8  | -4.70  | 0.00 | 0.042  | -4.60  | 0.0092  | 0.68  | 0.10  | 0.0088 | 0.0092  | 0.039  | 0.63   | 0.028  |
| 3 | 5.4  | 2.6  | 8  | -2.60  | 0.00 | 0.0070 | -2.00  | 0.0013  | 0.77  | 0.60  | 0.051  | 0.0013  | 0.0055 | 0.76   | 0.010  |

---

|                  |   |     |       |    |        |      |      |        |        |      |       |       |       |       |       |       |
|------------------|---|-----|-------|----|--------|------|------|--------|--------|------|-------|-------|-------|-------|-------|-------|
| <b>Crosswind</b> | 1 | 1.5 | 18.06 | 18 | -17.85 | 0.02 | 2.75 | -18.50 | -0.088 | 0.66 | -0.65 | 0.033 | -0.10 | 0.031 | -2.09 | 0.021 |
|------------------|---|-----|-------|----|--------|------|------|--------|--------|------|-------|-------|-------|-------|-------|-------|

---

---

|   |      |       |    |        |      |      |        |        |       |       |       |        |        |       |        |
|---|------|-------|----|--------|------|------|--------|--------|-------|-------|-------|--------|--------|-------|--------|
| 2 | 3.3  | 18.30 | 18 | -18.09 | 0.08 | 2.78 | -18.87 | 0.11   | 0.64  | -0.78 | 0.008 | 0.027  | 0.0057 | -2.14 | 0.030  |
| 3 | 5.4  | 18.79 | 18 | -18.57 | 0.22 | 2.86 | -19.49 | 0.44   | 0.59  | -0.91 | 0.027 | 0.21   | 0.069  | -2.27 | 0.021  |
| 4 | 7.9  | 19.66 | 18 | -19.42 | 0.51 | 2.99 | -20.34 | 0.76   | 0.67  | -0.91 | 0.048 | 0.25   | 0.041  | -2.32 | 0.027  |
| 5 | 10.7 | 20.94 | 18 | -20.67 | 1.02 | 3.18 | -21.64 | 1.13   | 0.66  | -0.97 | 0.018 | 0.12   | 0.025  | -2.52 | 0.0079 |
| 6 | 14   | 22.80 | 18 | -22.45 | 1.97 | 3.47 | -23.56 | 2.09   | 0.76  | -1.10 | 0.019 | 0.12   | 0.026  | -2.70 | 0.037  |
| 1 | 1.5  | 14.08 | 14 | -14.03 | 0.01 | 1.22 | -14.27 | -0.089 | 0.18  | -0.25 | 0.016 | -0.10  | 0.037  | -1.04 | 0.013  |
| 2 | 3.3  | 14.38 | 14 | -14.33 | 0.06 | 1.24 | -14.63 | -0.037 | 0.062 | -0.30 | 0.014 | -0.10  | 0.0029 | -1.18 | 0.0080 |
| 3 | 5.4  | 15.01 | 14 | -14.95 | 0.18 | 1.30 | -15.22 | 0.16   | 0.37  | -0.27 | 0.14  | -0.01  | 0.12   | -0.93 | 0.42   |
| 4 | 7.9  | 16.08 | 14 | -16.01 | 0.41 | 1.39 | -16.61 | 0.48   | 0.42  | -0.60 | 0.28  | 0.068  | 0.064  | -0.97 | 0.78   |
| 5 | 10.7 | 17.62 | 14 | -17.53 | 0.85 | 1.52 | -18.02 | 1.28   | 0.078 | -0.49 | 0.030 | 0.42   | 0.12   | -1.45 | 0.031  |
| 6 | 14   | 19.80 | 14 | -19.65 | 1.71 | 1.71 | -20.00 | 1.68   | 0.084 | -0.35 | 0.10  | -0.036 | 0.23   | -1.63 | 0.070  |
| 1 | 1.5  | 10.11 | 10 | -10.10 | 0.01 | 0.42 | -9.84  | -0.026 | -0.09 | 0.26  | 0.094 | -0.035 | 0.078  | -0.51 | 0.067  |
| 2 | 3.3  | 10.53 | 10 | -10.52 | 0.05 | 0.44 | -10.35 | -0.049 | -0.17 | 0.17  | 0.036 | -0.10  | 0.047  | -0.61 | 0.088  |
| 3 | 5.4  | 11.36 | 10 | -11.35 | 0.13 | 0.48 | -11.23 | 0.16   | -0.25 | 0.12  | 0.047 | 0.028  | 0.028  | -0.73 | 0.018  |
| 4 | 7.9  | 12.74 | 10 | -12.73 | 0.33 | 0.54 | -12.52 | 0.24   | -0.27 | 0.21  | 0.081 | -0.093 | 0.086  | -0.81 | 0.022  |
| 5 | 10.7 | 14.65 | 10 | -14.62 | 0.71 | 0.62 | -14.34 | 0.83   | -0.38 | 0.27  | 0.15  | 0.12   | 0.11   | -1.00 | 0.044  |
| 6 | 14   | 17.20 | 10 | -17.13 | 1.49 | 0.72 | -17.18 | 1.45   | -0.60 | -0.05 | 0.10  | -0.037 | 0.25   | -1.32 | 0.14   |

---

---

|   |      |       |   |        |      |      |        |        |        |        |        |        |        |       |       |
|---|------|-------|---|--------|------|------|--------|--------|--------|--------|--------|--------|--------|-------|-------|
| 1 | 1.5  | 8.14  | 8 | -8.14  | 0.01 | 0.21 | -7.96  | -0.073 | -0.071 | 0.17   | 0.003  | -0.080 | 0.0092 | -0.29 | 0.014 |
| 2 | 3.3  | 8.65  | 8 | -8.65  | 0.04 | 0.23 | -8.53  | -0.14  | -0.12  | 0.12   | 0.070  | -0.17  | 0.073  | -0.35 | 0.075 |
| 3 | 5.4  | 9.65  | 8 | -9.65  | 0.11 | 0.25 | -9.69  | 0.019  | -0.17  | -0.044 | 0.018  | -0.10  | 0.044  | -0.42 | 0.059 |
| 4 | 7.9  | 11.24 | 8 | -11.24 | 0.29 | 0.30 | -11.46 | 0.19   | -0.27  | -0.22  | 0.0078 | -0.10  | 0.014  | -0.57 | 0.010 |
| 5 | 10.7 | 13.36 | 8 | -13.34 | 0.65 | 0.35 | -13.68 | 0.58   | -0.29  | -0.34  | 0.044  | -0.063 | 0.21   | -0.64 | 0.051 |
| 6 | 14   | 16.12 | 8 | -16.06 | 1.40 | 0.43 | -16.69 | 1.30   | -0.22  | -0.64  | 0.0080 | -0.094 | 0.023  | -0.65 | 0.021 |

---
